# Supplementary material for: The BMP inhibitor DAND5 in serum predicts poor survival in breast cancer
Source: PubMed Central journal article supplement (PMC4924764; doi:10.18632/oncotarget.7498), 2016-02-19
Supplement: oncotarget-07-14951-s001.pdf [file oncotarget-07-14951-s001.pdf]

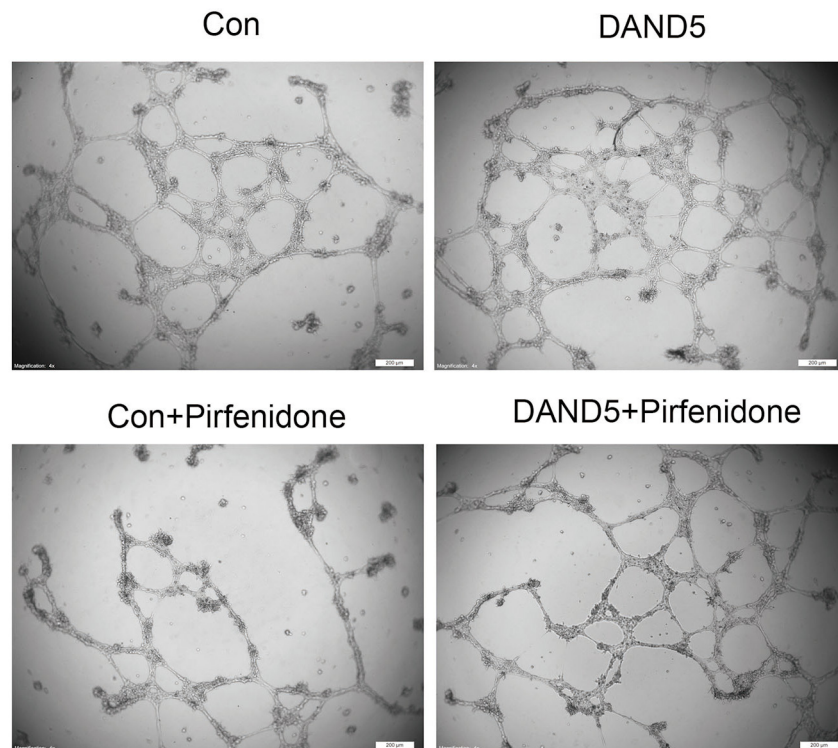

**Supplementary Figure S2: TGF  $\beta$  blocker Pirfenidone inhibited the angiogenesis induced by DAND5.** Representative pictures of pseudocapillary formation in matrigel from HUVECs in 0.1% FBS exposed to breast cancer cell culture and Pirfenidone at 12 h after cell seeding.
